# Supplementary material for: Co-intercalation strategy of constructing partial cation substitution of ammonium vanadate {(NH4)2V6O16} for stable zinc ion storage
Source: Royal Society of Chemistry journal article supplement (doi:10.1039/d2dt00665k), 2022-01-01
Supplement: d2dt00665k1.pdf [file d2dt00665k1.pdf]

**Supporting Information**

**Co-intercalation strategy of constructing partial cation substitution  
of ammonium vanadate  $\{(NH_4)_2V_6O_{16}\}$  for stable zinc ion storage**

Rui Sun<sup>a, b</sup>, Siyang Dong<sup>a</sup>, Feng Xu<sup>a</sup>, Zhiyong Li<sup>a, b</sup>, Caihong Wang, Shengjun Lu<sup>a\*</sup> and Haosen Fan<sup>b\*</sup>

<sup>a</sup>College of Materials Science and Metallurgy Engineering, Guizhou University, Guiyang 550025, China

<sup>b</sup>School of Chemistry and Chemical Engineering, Guangzhou University, Guangzhou 510006, China

E-mail: sjlu@gzu.edu.cn; hsfan@gzhu.edu.cn

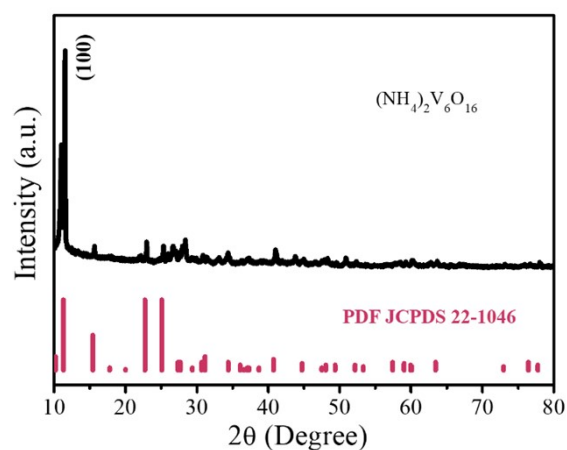

Fig. S1 XRD pattern of NVO.

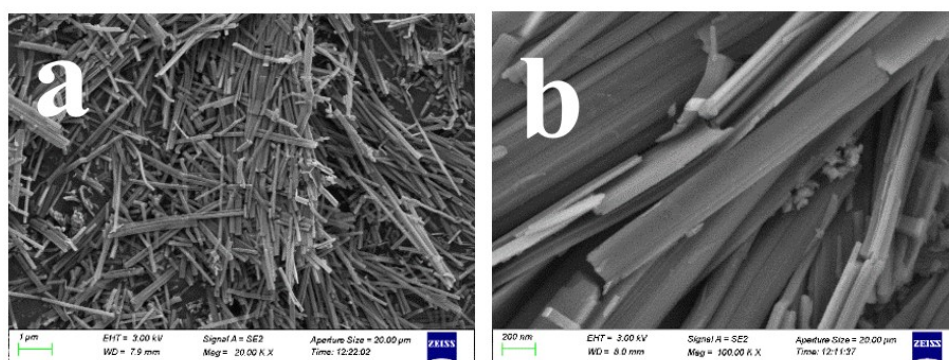

Fig. S2 (a, b) SEM images of NVO.

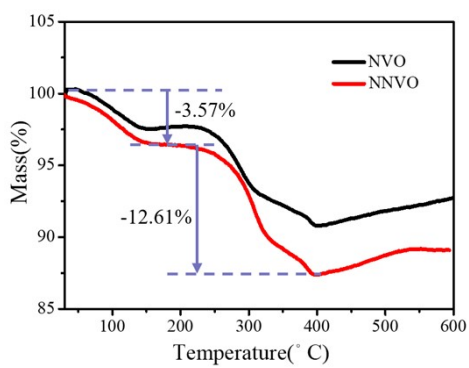

Fig. S3 The TG of NNVO and NVO. The TG analysis was tested in nitrogen.

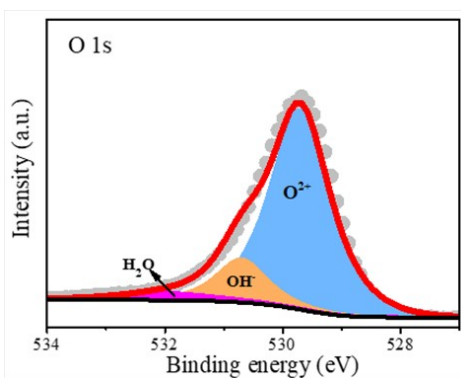

Fig. S4 O 1s regions of the XPS spectra of the NNVO.

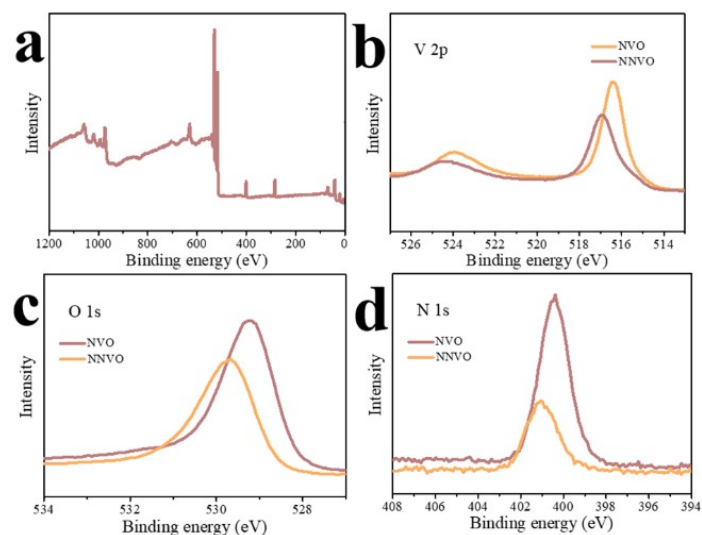

Fig. S5 (a) XPS spectra of the NVO composite. (b) V 2p, (c) N 1s, and (d) Na 1s regions of the XPS spectra of the NNVO and NVO.

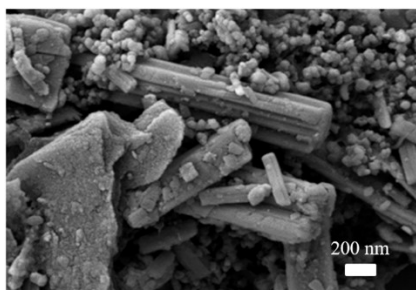

Fig. S6 The SEM image of NNVO after cycles at  $0.1 \text{ A g}^{-1}$ .

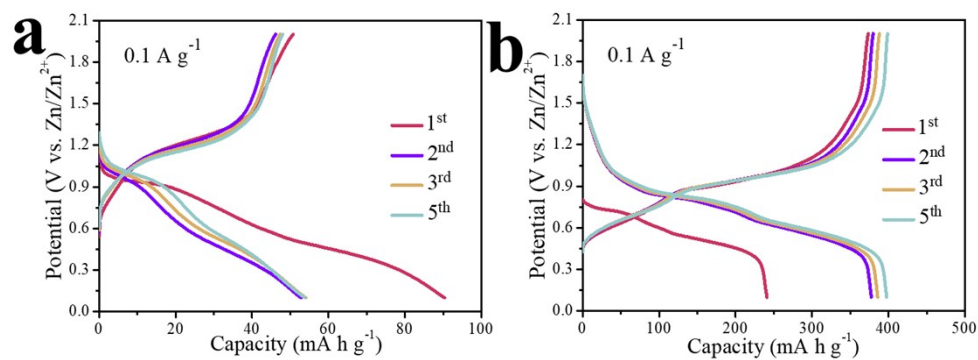

Fig. S7 Galvanostatic discharge-charge curves of  $\text{V}_2\text{O}_5$  and NVO at  $0.1 \text{ A g}^{-1}$ , respectively.

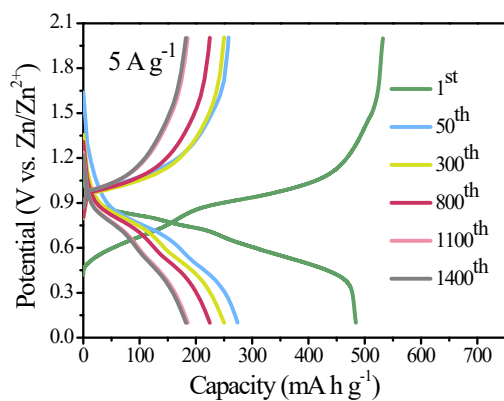

Fig. S8 Galvanostatic discharge-charge curves of NNVO at  $5 \text{ A g}^{-1}$ .

Table S1. comparison of the electrochemical performance among NNVO and other reported V-based cathode materials.

| Materials                                                            | Electrolyte                                                                           | Voltage window<br>(V vs Zn/Zn <sup>2+</sup> ) | The energy density (Wh kg <sup>-1</sup> ) | Cyclic capacity (mAh g <sup>-1</sup> /th/A g <sup>-1</sup> ) | Ref.             |
|----------------------------------------------------------------------|---------------------------------------------------------------------------------------|-----------------------------------------------|-------------------------------------------|--------------------------------------------------------------|------------------|
| (NH <sub>4</sub> ) <sub>2</sub> V <sub>6</sub> O <sub>16</sub>       | 3 M Zn(CF <sub>3</sub> SO <sub>3</sub> ) <sub>2</sub>                                 | 0.3-1.7                                       | 249                                       | 238.7/2000/5                                                 | 1                |
| CaV <sub>6</sub> O <sub>16</sub> ·3H <sub>2</sub> O                  | 3 M Zn(CF <sub>3</sub> SO <sub>3</sub> ) <sub>2</sub>                                 | 0.01-2.0                                      | -                                         | 230/300/1                                                    | 2                |
| Na <sub>2</sub> V <sub>6</sub> O <sub>16</sub> ·2.14H <sub>2</sub> O | 1 M ZnSO <sub>4</sub> ·7H <sub>2</sub> O and<br>0.2 M Na <sub>2</sub> SO <sub>4</sub> | 0.2-1.6                                       | 312                                       | 210/500/5                                                    | 3                |
| Na <sub>1+x</sub> V <sub>3</sub> O <sub>8</sub>                      | 2 M ZnSO <sub>4</sub>                                                                 | 0.4-1.4                                       | -                                         | Ca.280/50/1                                                  | 4                |
| CrVO <sub>3</sub>                                                    | 3 M ZnSO <sub>4</sub>                                                                 | 0.4-1.7                                       | 231.9                                     | 85.7/1000/4                                                  | 5                |
| β-AgVO <sub>3</sub>                                                  | 1.5 M ZnSO <sub>4</sub>                                                               | 0.4-1.3                                       | 90                                        | 95/1000/2                                                    | 6                |
| <b>NNOD</b>                                                          | <b>3 M Zn(CF<sub>3</sub>SO<sub>3</sub>)<sub>2</sub></b>                               | <b>0.1-2.0</b>                                | <b>350.3</b>                              | <b>423.9/90/0.1;</b><br><b>182.5/1400/5</b>                  | <b>This work</b> |

## References

1. L. Xu, Y. Zhang, H. Jiang, J. Zheng, X. Dong, T. Hu and C. Meng, *Colloids and Surfaces A: Colloid surface A*, 2020, **593**, 124621.
2. N. Xu, X. Lian, H. Huang, Y. Ma, L. Li and S. Peng, *Mater. Lett.*, 2021, **287**, 129285.
3. F. Hu, D. Xie, D. Zhao, G. Song and K. Zhu, *J. Energy Chem.*, 2019, **38**, 185-191.
4. S. J. Kim, C. R. Tang, G. Singh, L. M. Housel, S. Yang, K. J. Takeuchi, A. C. Marschilok, E. S. Takeuchi and Y. Zhu, *Chem. Mater.*, 2020, **32**, 2053-2060.
5. Y. Bai, H. Zhang, B. Xiang, Y. Zhou, L. Dou and G. Dong, *J. Colloid Inter. Sci.*, 2021, **597**, 422-428.
6. H. Liu, J. G. Wang, H. Sun, Y. Li, J. Yang, C. Wei and F. Kang, *J. Colloid Inter. Sci.*, 2020, **560**, 659-666.
